# Supplementary material
Source: PubMed Central journal article supplement (PMC8208087)
Supplement: NIHMS1700391-supplement-SI.pdf [file NIHMS1700391-supplement-SI.pdf]

# Supporting Information

## A Benchmark of Electrostatic Method Performance in Relative Binding Free Energy Calculations

Yunhui Ge,<sup>†</sup> David F. Hahn,<sup>‡</sup> and David L. Mobley<sup>\*,†,¶</sup>

<sup>†</sup>*Department of Pharmaceutical Sciences, University of California, Irvine, CA 92697, USA*

<sup>‡</sup>*Computational Chemistry, Janssen Research & Development, Turnhoutseweg 30, Beerse  
B-2340, Belgium*

<sup>¶</sup>*Department of Chemistry, University of California, Irvine, CA 92697, USA*

E-mail: dmobley@mobleylab.org

### Molecular Dynamics Simulations

The simulations were performed using GROMACS (2021-dev-20200320-89f1227-unknown) with a patch optimizing PME performance on GPU (<https://gerrit.gromacs.org/c/gromacs/+/13382>).

For each perturbation, two sets of simulations were prepared: solvated ligands and ligand-protein complexes. The initial ligand and protein structures were obtained from a previous published work.<sup>1</sup>

The ligand was parameterized using Open Force Field version 1.0.0 (codenamed "Parsley").<sup>2</sup> Hybrid structures and topologies for the ligand pairs were generated using pmx<sup>3,4</sup> following a single topology approach. The workflow established a mapping between atoms

of two ligands based on the maximum common substructure and conformational alignment while minimizing perturbation and stabilizing the system.

The AMBER ff99sb\*ILDN force field<sup>5-7</sup> was used for protein parameterization. Dodecahedral boxes were filled with TIP3P explicit solvent model solvated ligand pairs/ligand-protein complexes and counterions (150 mM NaCl).

For each perturbation, two states were prepared for both in-solution/bound state ligands: state A and state B, representing ligand 1 and ligand 2, respectively. An energy minimization was first performed, followed by a 10 ps NVT equilibration at 298K. Then the production equilibrium simulation (in the NPT ensemble) was performed for 6 ns at 298 K and a pressure of 1 bar. 80 snapshots were extracted from the production simulation. For each snapshot, a non-equilibrium transformation from state A to B (and vice versa) was performed during 50 ps. For each perturbation, 3 replicas of the series of simulations described above were performed leading to a total of 60 ns simulation data to calculate the free energy differences for the ligands in their in-solution/bound states.

The stochastic dynamics thermostat was used to control the temperature in the simulations. The Parrinello-Rahman barostat<sup>8</sup> was applied to keep the pressure constant. All bond lengths were constrained using the LINCS algorithm.<sup>9</sup> The van der Waals interactions were smoothly switched off between 1.0 and 1.1 nm. A dispersion correction for energy and pressure was used. The non-bonded interactions for the alchemical transitions were treated with a modified soft-core potential.<sup>10</sup>

Two different methods implemented in GROMACS were used to treat long-range electrostatic interactions: Particle Mesh Ewald (PME) and Reaction Field (RF). For simulations using PME, a direct space cutoff of 1.1 nm and a Fourier grid spacing of 0.12 nm were used. For simulations using RF, a dielectric constant ( $\epsilon_{rf}$ ) of 78.3, the dielectric constant of water at 298 K was used.<sup>11</sup>

# Supporting Tables

Table S1: Simulated perturbations of TYK2 and the number of particles.

| Ligand1 | Ligand 2 | No. atoms (ligand-only) | No. atoms (protein-ligand) |
|---------|----------|-------------------------|----------------------------|
| ejm-44  | ejm-55   | 5954                    | 62290                      |
| ejm-49  | ejm-31   | 6521                    | 62288                      |
| ejm-31  | ejm-46   | 5888                    | 62281                      |
| jmc-28  | jmc-27   | 5886                    | 62282                      |
| ejm-42  | ejm-48   | 6014                    | 62290                      |
| ejm-31  | ejm-43   | 5950                    | 62286                      |
| ejm-50  | ejm-42   | 5630                    | 62272                      |
| ejm-42  | ejm-55   | 5633                    | 62275                      |
| jmc-23  | ejm-46   | 5884                    | 62277                      |
| ejm-31  | ejm-45   | 5638                    | 62283                      |
| ejm-55  | ejm-54   | 5729                    | 62278                      |
| ejm-45  | ejm-42   | 5639                    | 62284                      |
| ejm-31  | ejm-48   | 5960                    | 62284                      |
| ejm-47  | ejm-31   | 5906                    | 62290                      |
| ejm-47  | ejm-55   | 5915                    | 62290                      |
| ejm-44  | ejm-42   | 5956                    | 62295                      |
| jmc-23  | jmc-27   | 5886                    | 62276                      |
| ejm-43  | ejm-55   | 5951                    | 62281                      |
| jmc-23  | jmc-30   | 5884                    | 62277                      |
| jmc-28  | jmc-30   | 5887                    | 62286                      |
| ejm-42  | ejm-54   | 5640                    | 62282                      |
| ejm-49  | ejm-50   | 6517                    | 62290                      |
| jmc-23  | ejm-55   | 5887                    | 62289                      |
| ejm-31  | jmc-28   | 5889                    | 62291                      |
| jmc-23  | jmc-27   | 5886                    | 62276                      |

Table S2: Simulated perturbations of CDK2 and the number of particles.

| Ligand1 | Ligand 2 | No. atoms (ligand-only) | No. atoms (protein-ligand) |
|---------|----------|-------------------------|----------------------------|
| 22      | 1h1r     | 4978                    | 106892                     |
| 1oiu    | 26       | 5885                    | 106905                     |
| 26      | 1h1q     | 5762                    | 106902                     |
| 17      | 1h1q     | 4987                    | 106904                     |
| 1oiy    | 1oi9     | 5675                    | 106908                     |
| 17      | 21       | 4984                    | 106895                     |

Table S3: Calculated  $\Delta\Delta G$  values (kcal/mol) and the experimental measured values of simulated perturbations of TYK2. The uncertainty estimates were performed by 1000 bootstrapping trials and are reported as  $x_{x_{low}}^{x_{high}}$  where  $x$  is the mean value,  $x_{high}$  and  $x_{low}$  indicate 95% confidence intervals.

| Ligand1 | Ligand 2 | $\Delta\Delta G$<br>(CPU-PME)        | $\Delta\Delta G$<br>(GPU-PME)        | $\Delta\Delta G$<br>(CPU-RF)         | $\Delta\Delta G$<br>(GPU-RF)         | $\Delta\Delta G$<br>(EXP) |
|---------|----------|--------------------------------------|--------------------------------------|--------------------------------------|--------------------------------------|---------------------------|
| ejm-44  | ejm-55   | -4.40±0.44                           | -4.54±0.73                           | -3.88±0.55                           | -4.79±0.70                           | -1.79                     |
| ejm-49  | ejm-31   | -0.89±0.13                           | -0.57±0.09                           | -0.81±0.20                           | -0.59±0.36                           | -1.79                     |
| ejm-31  | ejm-46   | -0.25±0.21                           | -0.96±0.17                           | -0.71±0.07                           | -0.68±0.11                           | -1.77                     |
| jmc-28  | jmc-27   | -0.71±0.06                           | -0.63±0.06                           | -0.91±0.11                           | -1.00±0.08                           | -0.30                     |
| ejm-42  | ejm-48   | 0.83±0.23                            | 1.22±0.26                            | 1.01±0.11                            | 1.25±0.24                            | 0.78                      |
| ejm-31  | ejm-43   | 1.87±0.11                            | 1.94±0.12                            | 1.58±0.63                            | 1.58±0.41                            | 1.28                      |
| ejm-50  | ejm-42   | -0.24±0.13                           | 0.07±0.12                            | -0.16±0.11                           | 0.12±0.13                            | -0.80                     |
| ejm-42  | ejm-55   | -1.17±0.12                           | -0.95±0.10                           | -1.05±0.07                           | -1.07±0.12                           | 0.57                      |
| jmc-23  | ejm-46   | -0.04±0.18                           | -0.31±0.19                           | 0.13±0.13                            | 0.30±0.13                            | 0.39                      |
| ejm-55  | ejm-54   | -1.10±0.31                           | -0.86±0.10                           | -0.99±0.19                           | -1.22±0.07                           | -1.32                     |
| ejm-45  | ejm-42   | 0.57±0.07                            | 0.12±0.11                            | 0.45±0.12                            | 0.50±0.18                            | -0.22                     |
| ejm-31  | ejm-48   | 0.63±0.34                            | 1.12±0.43                            | 0.94±0.30                            | 0.65±0.72                            | 0.54                      |
| ejm-47  | ejm-31   | -0.12±0.34                           | -0.27±0.72                           | -0.30±0.22                           | -0.20±0.26                           | 0.16                      |
| ejm-47  | ejm-55   | -0.91±0.11                           | -0.77±0.24                           | -0.63±0.17                           | -0.82±0.24                           | 0.49                      |
| ejm-44  | ejm-42   | -2.22±0.11                           | -2.12±0.36                           | -2.39±0.64                           | -1.86±0.27                           | -2.36                     |
| jmc-23  | jmc-27   | 0.07±0.21                            | 0.13±0.16                            | 0.11±0.19                            | 0.28±0.06                            | 0.42                      |
| ejm-43  | ejm-55   | -2.40±0.30                           | -2.60±0.26                           | -2.08±0.33                           | -2.23±0.37                           | -0.95                     |
| jmc-23  | jmc-30   | -0.38±0.09                           | -0.29±0.06                           | -0.22±0.10                           | -0.06±0.13                           | 0.76                      |
| jmc-28  | jmc-30   | -1.00±0.17                           | -1.06±0.48                           | -1.14±0.23                           | -1.40±0.19                           | 0.04                      |
| ejm-42  | ejm-54   | -1.33±0.17                           | -1.36±0.18                           | -1.43±0.11                           | -1.54±0.12                           | -0.75                     |
| ejm-49  | ejm-50   | -1.28±0.28                           | -1.18±0.32                           | -1.75±0.11                           | -1.38±0.41                           | -1.23                     |
| jmc-23  | ejm-55   | 0.35±0.33                            | -0.13±0.17                           | 0.12±0.38                            | 0.09±0.21                            | 2.49                      |
| ejm-31  | ejm-45   | 0.47±0.31                            | 0.54±0.22                            | 0.49±0.29                            | 0.61±0.11                            | -0.02                     |
| ejm-31  | jmc-28   | -0.58±0.24                           | -0.56±0.17                           | -0.15±0.41                           | 0.18±0.30                            | -1.44                     |
| RMSE    |          | 1.09 <sup>1.43</sup> <sub>0.77</sub> | 1.16 <sup>1.56</sup> <sub>0.82</sub> | 1.04 <sup>1.35</sup> <sub>0.76</sub> | 1.20 <sup>1.61</sup> <sub>0.83</sub> |                           |
| MUE     |          | 0.86 <sup>1.14</sup> <sub>0.61</sub> | 0.93 <sup>1.27</sup> <sub>0.66</sub> | 0.86 <sup>1.10</sup> <sub>0.64</sub> | 0.94 <sup>1.27</sup> <sub>0.66</sub> |                           |

Table S4: Simulation wallclock time (min) of TYK2.

| Simulation | complex      | ligand-only |
|------------|--------------|-------------|
| CPU-PME    | 2838.2±328.1 | 288.1±27.6  |
| GPU-PME    | 185.4±4.12   | 69.0±3.8    |
| CPU-RF     | 1903.7±334.2 | 211.6±20.5  |
| GPU-RF     | 204.7±5.9    | 66.0±4.8    |

Table S5: Simulation wallclock time (min) of CDK2.

| Simulation | complex      | ligand-only |
|------------|--------------|-------------|
| CPU-PME    | 4447.3±423.7 | 252.8±24.7  |
| GPU-PME    | 326.8±6.5    | 83.1±3.8    |
| CPU-RF     | 3143.0±204.5 | 210.2±21.9  |
| GPU-RF     | 325.9±11.9   | 77.2±4.3    |

## References

- (1) Gapsys, V.; Pérez-Benito, L.; Aldeghi, M.; Seeliger, D.; van Vlijmen, H.; Tresadern, G.; de Groot, B. L. Large Scale Relative Protein Ligand Binding Affinities Using Non-Equilibrium Alchemy. *Chem. Sci.* **2020**, *11*, 1140–1152.
- (2) Qiu, Y.; Smith, D. G. A.; Boothroyd, S.; Jang, H.; Wagner, J.; Bannan, C. C.; Gokey, T.; Lim, V. T.; Stern, C. D.; Rizzi, A.; Lucas, X.; Tjanaka, B.; Shirts, M. R.; Gilson, M. K.; Chodera, J. D.; Bayly, C. I.; Mobley, D. L.; Wang, L.-P. Development and Benchmarking of Open Force Field v1.0.0, the Parsley Small Molecule Force Field. *ChemRxiv* **2020**,
- (3) Seeliger, D.; de Groot, B. L. Protein Thermostability Calculations Using Alchemical Free Energy Simulations. *Biophys. J.* **2010**, *98*, 2309–2316.
- (4) Gapsys, V.; Michielssens, S.; Seeliger, D.; de Groot, B. L. Pmx: Automated Protein Structure and Topology Generation for Alchemical Perturbations. *J. Comput. Chem.* **2015**, *36*, 348–354.
- (5) Hornak, V.; Abel, R.; Okur, A.; Strockbine, B.; Roitberg, A.; Simmerling, C. Comparison of Multiple Amber Force Fields and Development of Improved Protein Backbone Parameters. *Proteins: Struct., Funct., Bioinf.* **2006**, *65*, 712–725.
- (6) Best, R. B.; Hummer, G. Optimized Molecular Dynamics Force Fields Applied to the Helix-Coil Transition of Polypeptides. *J. Phys. Chem. B* **2009**, *113*, 9004–9015.
- (7) Lindorff-Larsen, K.; Piana, S.; Palmo, K.; Maragakis, P.; Klepeis, J. L.; Dror, R. O.; Shaw, D. E. Improved Side-Chain Torsion Potentials for the Amber ff99SB Protein Force Field: Improved Protein Side-Chain Potentials. *Proteins: Struct., Funct., Bioinf.* **2010**, *78*, 1950–1958.

- (8) Parrinello, M.; Rahman, A. Polymorphic Transitions in Single Crystals: A New Molecular Dynamics Method. *J. Appl. Phys.* **1981**, *52*, 7182–7190.
- (9) Hess, B.; Bekker, H.; Berendsen, H. J. C. LINCS: A Linear Constraint Solver for Molecular Simulations. *J. Comput. Chem.* **1997**, *18*, 1463–1472.
- (10) Gapsys, V.; Seeliger, D.; de Groot, B. L. New Soft-Core Potential Function for Molecular Dynamics Based Alchemical Free Energy Calculations. *J. Chem. Theory Comput.* **2012**, *8*, 2373–2382.
- (11) Malmberg, C. G.; Maryott, A. A. Dielectric Constant of Water From 0-Degrees-C to 100-Degrees-C. *J. Res. Natl. Bur. Stand. (U. S.)* **1956**, *56*, 1–8.
